# Supplementary material
Source: PubMed Central journal article supplement (PMC3879907)
Supplement: supp_blood-2013-06-509463_blood-2013-06-509463-1.pdf [file supp_blood-2013-06-509463_blood-2013-06-509463-1.pdf]

**Table of contents**

|                                                                                                                       |    |
|-----------------------------------------------------------------------------------------------------------------------|----|
| Supplementary Figure 1. Treatment outcome according to standard- and high-risk NCI criteria in DS-ALL patients.       | 2  |
| Supplementary Table 1. Participating study groups                                                                     | 3  |
| Supplementary Table 2. Collected variables in the dataset                                                             | 4  |
| Supplementary Table 3. Details of the various treatment protocols used in this study.                                 | 5  |
| Supplementary Table 4. Patient characteristics and outcome parameters of the 5 excluded T cell DS-ALL patients.       | 8  |
| Supplementary Table 5. <i>JAK2</i> and <i>CRLF2</i> subgroup analysis                                                 | 9  |
| Supplementary Table 6. Patient characteristics of NCI-SR DS-ALL patients considered HR by PdL DS risk group criteria. | 10 |
| Supplementary Table 7. Specified cause of death for TRM                                                               | 11 |

**Supplementary Figure 1. Treatment outcome according to standard- and high-risk NCI criteria in DS-ALL patients.**

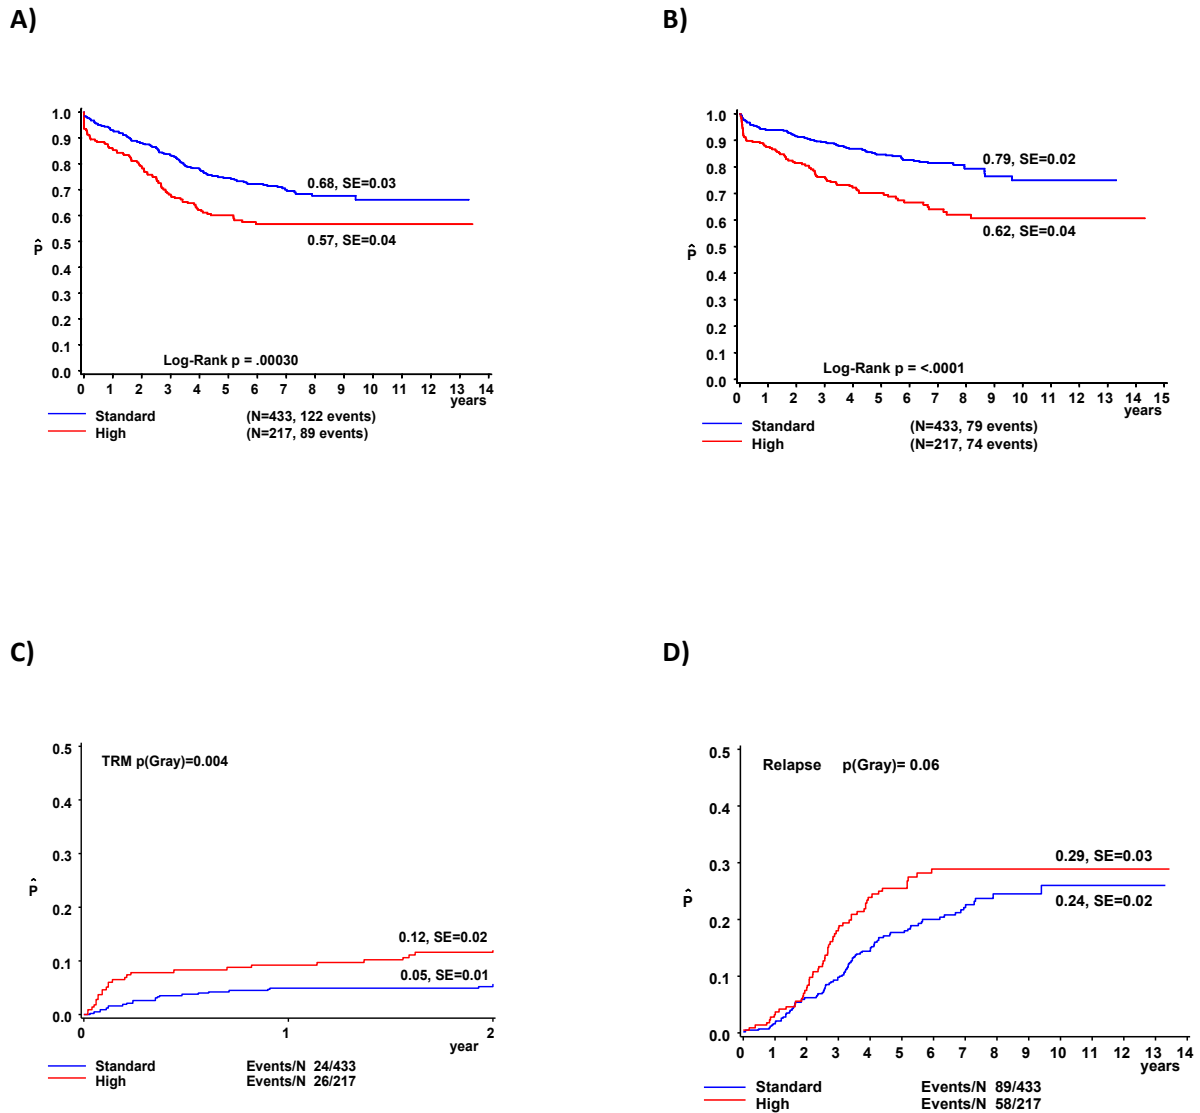

The overall survival (A), event-free survival (B), cumulative risk of mortality (C) and cumulative risk of relapse (D) depicted for patients with NCI standard-risk and high-risk patients with cut off values for WBC  $< \text{or } \geq 50 \times 10^9/\text{L}$  and age  $< \text{or } \geq 10$  years. The numbers on the curves for overall survival and event-free survival represent results at 8 years. The numbers on the curves for treatment-related mortality are 2-year results and those for relapse are results at 8 years.

**Supplementary Table 1. Participating study groups**

| Name study group                                                                                                        | Number of patients |
|-------------------------------------------------------------------------------------------------------------------------|--------------------|
| North American Children's Oncology Group including the Children's Cancer Group and the Pediatric Oncology Group studies | 202                |
| German Berlin-Frankfurt-Münster Study Group                                                                             | 109                |
| UK Medical Research Council                                                                                             | 66                 |
| Italian Associazione Italiana di Ematologia ed Oncologia Pediatrica                                                     | 63                 |
| Scandinavian Nordic Society for Pediatric Hematology and Oncology                                                       | 43                 |
| Belgian European Organization for Research and Treatment of Cancer                                                      | 31                 |
| Dutch Childhood Oncology Group                                                                                          | 30                 |
| North American Dana Faber Cancer Institute                                                                              | 27                 |
| Japan Association of Childhood Leukemia Study                                                                           | 18                 |
| German Cooperative study-group for childhood acute lymphoblastic leukemia                                               | 16                 |
| St. Jude Children's Research Hospital                                                                                   | 13                 |
| Tokyo Children's Cancer Study Group                                                                                     | 10                 |
| Taiwan Pediatric Oncology Group                                                                                         | 9                  |
| Polish Paediatric Leukaemia and Lymphoma Study Group                                                                    | 8                  |
| Israel National Study group for Childhood ALL                                                                           | 8                  |

**Supplementary Table 2. Collected variables in the dataset**

| Collected variables in the dataset                                                                                                                                                    |                                                    |
|---------------------------------------------------------------------------------------------------------------------------------------------------------------------------------------|----------------------------------------------------|
| Patient ID                                                                                                                                                                            | Name of protocol                                   |
| Study group                                                                                                                                                                           | Use of Anthracyclines in induction: yes/no         |
| Lab ID cytogenetic lab                                                                                                                                                                | Steroids in induction: Prednisone or Dexamethasone |
| Date of birth                                                                                                                                                                         | L' asparaginase in induction: yes or no            |
| Gender                                                                                                                                                                                | Dose of Methotrexate: gram/m2                      |
| Age at diagnosis                                                                                                                                                                      | Therapy reduction: yes/no, agent, dose             |
| Date of diagnosis                                                                                                                                                                     | Day 6-9 BM evaluated                               |
| Hepatomegaly                                                                                                                                                                          | Day 6-9 BM evaluated                               |
| Splenomegaly                                                                                                                                                                          | Day 6-9 PB evaluated                               |
| Lymphnodes                                                                                                                                                                            | Day 6-9 PB evaluated                               |
| Mediastinal involvement                                                                                                                                                               | Day 12-16 BM evaluated                             |
| Testicular infiltration                                                                                                                                                               | Day 12-16 BM evaluated                             |
| Hemoglobine                                                                                                                                                                           | Start date and name of therapy block 1             |
| Platelets                                                                                                                                                                             | Start date and name of therapy block 2             |
| White bloodcell count                                                                                                                                                                 | Start date and name of therapy block 3             |
| CNS involvement                                                                                                                                                                       | Start date and name of therapy block 4             |
| Percentage blasts in PB by morphology                                                                                                                                                 | Start date and name of therapy block 5             |
| Percentage blasts in PB by immunology                                                                                                                                                 | Start date and name of therapy block 6             |
| BM aspirate: percentage blasts morphologically                                                                                                                                        | Start date and name of therapy block 7             |
| BM aspirate: percentage blasts immunological                                                                                                                                          | Start date and name of therapy block 8             |
| Trephine % blasts morphologically                                                                                                                                                     | Irradiation and dose                               |
| Trephine % blasts immunology                                                                                                                                                          | Therapy Comments                                   |
| Immunophenotype determined on PB or BM                                                                                                                                                | Stemcell transplantation, type and date            |
| Immunophenotype                                                                                                                                                                       | Date of CR                                         |
| Date karyotype                                                                                                                                                                        | Date of relapse                                    |
| Karyotype on PB or BM                                                                                                                                                                 | Date and type of secondary malignancy              |
| Karyotype (ISCN 1995 nomenclature)                                                                                                                                                    | Date and status at last follow up                  |
| Number of metaphases                                                                                                                                                                  | Date of death                                      |
| Ploidy                                                                                                                                                                                | Cause of death                                     |
| FISH for <i>ETV6-RUNX1</i> , <i>BCR-ABL</i> , <i>MLL-AF4</i> , and any other FISH performed.                                                                                          | General comments                                   |
| Percentage of positive cells in FISH                                                                                                                                                  |                                                    |
| Number of assessed nuclei in FISH                                                                                                                                                     |                                                    |
| PCR for <i>ETV6-RUNX1</i> , <i>BCR-ABL</i> , <i>MLL-AF4</i> , and any other PCR performed.                                                                                            |                                                    |
| <i>CRLF2</i> gene rearrangement                                                                                                                                                       |                                                    |
| <i>JAK</i> 1-3 mutation                                                                                                                                                               |                                                    |
| DNA index                                                                                                                                                                             |                                                    |
| If available percentage of positive cells of CD33, CD 117, TdT, HLA-DR, CD19, CD10, CD20, CD22, CD79a, CD1, TCR a/b, TCR g/d, CD13, CD33, cylgM, CD2, CD3m, CD3cy, CD4, CD5, CD7, CD8 |                                                    |

BUITENKAMP, et al. AN INTERNATIONAL RETROSPECTIVE ANALYSIS OF DS ALL  
 SUPPLEMENTARY FIGURES AND TABLES

**Supplementary Table 3. Details of the various treatment protocols used in this study.**

| Study group | Protocol                 | Methotrexate (gram/m <sup>2</sup> ) | Anthracycline | Induction steroids | L-asparaginase |
|-------------|--------------------------|-------------------------------------|---------------|--------------------|----------------|
| AIEOP       | AIEOP ALL 95 SR          | 1 <sup>1</sup>                      | No            | Prednisone         | Yes            |
| AIEOP       | AIEOP ALL 95 MR          | 1 <sup>1</sup>                      | Yes           | Prednisone         | Yes            |
| AIEOP       | AIEOP ALL 95 HR          | 1 <sup>1</sup>                      | Yes           | Prednisone         | Yes            |
| AIEOP       | AIEOP ALL 2000           | 1 <sup>1</sup>                      | Yes           | Prednisone         | Yes            |
| AIEOP       | AIEOP ALL 2000 (SR1)     | 1 <sup>1</sup>                      | Yes           | Prednisone         | Yes            |
| AIEOP       | AIEOP ALL 2000 (SR2)     | 1 <sup>1</sup>                      | Yes           | Prednisone         | Yes            |
| AIEOP       | AIEOP ALL 2000 (MR1)     | 1 <sup>1</sup>                      | Yes           | Prednisone         | Yes            |
| AIEOP       | AIEOP ALL 2000 (MR2)     | 1 <sup>1</sup>                      | Yes           | Prednisone         | Yes            |
| AIEOP       | AIEOP ALL 2000 (DXM)     | 1 <sup>1</sup>                      | Yes           | Dexamethasone      | Yes            |
| AIEOP       | AIEOP ALL 2000 (DXM-SR1) | 1 <sup>1</sup>                      | Yes           | Dexamethasone      | Yes            |
| AIEOP       | AIEOP ALL 2000 (PDN-MR1) | 1 <sup>1</sup>                      | Yes           | Prednisone         | Yes            |
| AIEOP       | AIEOP ALL 2000 (DXM-MR2) | 1 <sup>1</sup>                      | Yes           | Dexamethasone      | Yes            |
| AIEOP       | AIEOP ALL 2000 (PDN-MR2) | 1 <sup>1</sup>                      | Yes           | Prednisone         | Yes            |
| BFM-A       | ALL-BFM 95 SR            | 5                                   | Yes           | Prednisone         | Yes            |
| BFM-A       | ALL-BFM 95 MR            | 5                                   | Yes           | Prednisone         | Yes            |
| BFM-A       | ALL-BFM 2000 SR          | 5                                   | Yes           | Prednisone         | Yes            |
| BFM-A       | ALL-BFM 2000 MR          | 5                                   | Yes           | Prednisone         | Yes            |
| BFM-G       | ALL-BFM 95 SR            | 5                                   | Yes           | Prednisone         | Yes            |
| BFM-G       | ALL-BFM 95 MR            | 5                                   | Yes           | Prednisone         | Yes            |
| BFM-G       | ALL-BFM 2000 SR          | 5.0 <sup>2</sup>                    | Yes           | Prednisone         | Yes            |
| BFM-G       | ALL-BFM 2000 MR          | 5.0 <sup>2</sup>                    | Yes           | Prednisone         | Yes            |
| BFM-G       | ALL-BFM 2000 HR          | 5.0 <sup>2</sup>                    | Yes           | Prednisone         | Yes            |
| CCG         | 1952                     | No HD MTX                           | No            | Prednisone         | Yes            |
| CCG         | 1961                     | No HD MTX                           | Yes           | Prednisone         | Yes            |
| CCG         | 1991                     | No HD MTX                           | No            | Dexamethasone      | Yes            |
| POG         | 9201                     | 0.5 <sup>3</sup>                    | No            | No                 | No             |
| POG         | 9405                     | 1 <sup>4</sup>                      | No            | Prednisone         | Yes            |
| POG         | 9406                     | 1 <sup>4</sup>                      | No            | Prednisone         | Yes            |
| POG         | 9605                     | 0.5 <sup>3</sup>                    | No            | Prednisone         | Yes            |
| POG         | 9904                     | 0.5 <sup>3</sup>                    | No            | Dexamethasone      | Yes            |
| POG         | 9905*                    | 0.5 <sup>3</sup>                    | No            | Dexamethasone      | Yes            |
| POG         | 9906*                    | 0.5 <sup>3</sup>                    | No            | Prednisone         | Yes            |
| DCOG        | ALL8                     | 5                                   | Yes           | Prednisone         | Yes            |
| DCOG        | ALL9 NHR                 | 3                                   | No            | Dexamethasone      | Yes            |
| DCOG        | ALL9 HR                  | 5                                   | Yes           | Dexamethasone      | Yes            |
| DCOG        | ALL10                    | 5                                   | Yes           | Prednisone         | Yes            |
| DFCI        | 95001 (SR)               | 4                                   | Yes           | Prednisone         | Yes            |
| DFCI        | 95001 (HR)               | 4                                   | Yes           | Prednisone         | Yes            |
| DFCI        | 00001 (SR)               | 4                                   | Yes           | Prednisone         | Yes            |
| DFCI        | 00001 (HR)               | 4                                   | Yes           | Prednisone         | Yes            |
| EORTC       | EORTC CLG 58881          | 5                                   | Yes           | Prednisone         | Yes            |
| EORTC       | EORTC CLG 58951          | 5 <sup>5</sup>                      | Yes           | Randomized trial   | Yes            |
| Israel      | 93-01(ALL -BFM 90 mod)   | 5                                   | Yes           | Prednisone         | Yes            |
| Israel      | 98-01(ALL-BFM 95 SR)     | 5                                   | Yes           | Prednisone         | Yes            |
| Israel      | 98-02(ALL-BFM 95 MR)     | 5                                   | Yes           | Prednisone         | Yes            |
| Israel      | 03-02-00(IC-BFM 2002)    | 5                                   | Yes           | Prednisone         | Yes            |

BUITENKAMP, et al. AN INTERNATIONAL RETROSPECTIVE ANALYSIS OF DS ALL  
 SUPPLEMENTARY FIGURES AND TABLES

| Study group | Protocol                                | Methotrexate (gram/m2) | Anthracycline | Induction steroids           | L'asparaginase |
|-------------|-----------------------------------------|------------------------|---------------|------------------------------|----------------|
| JACLS       | JACLS ALL 97-SR                         | No HD MTX              | Yes           | Dexamethasone and Prednisone | Yes            |
| JACLS       | JACLS ALL 97-IR                         | No HD MTX              | Yes           | Dexamethasone and Prednisone | Yes            |
| JACLS       | JACLS ALL 97-HR                         | No HD MTX              | Yes           | Dexamethasone and Prednisone | Yes            |
| JACLS       | JACLS ALL 02-SR                         | No HD MTX              | Yes           | Prednisone                   | Yes            |
| JACLS       | JACLS ALL 02-ER                         | No HD MTX              | Yes           | Prednisone                   | Yes            |
| JACLS       | JACLS ALL 02-HR                         | No HD MTX              | Yes           | Prednisone                   | Yes            |
| UKCLWP      | ALL97                                   | 6-8                    | No            | Randomized trial             | Yes            |
| UKCLWP      | ALL97 HR1                               | 6-8                    | No            | Randomized trial             | Yes            |
| UKCLWP      | ALL9799 B                               | No HD MTX              | Yes           | Randomized trial             | Yes            |
| UKCLWP      | UKALLI92                                | No HD MTX              | No            | Prednisone                   | Yes            |
| UKCLWP      | UKALL2003 A                             | No HD MTX              | No            | Dexamethasone                | No             |
| UKCLWP      | UKALL2003 B                             | No HD MTX              | Yes           | Dexamethasone                | Yes            |
| UKCLWP      | UKALL2003 C                             | No HD MTX              | Yes           | Dexamethasone                | Yes            |
| NOPHO       | ALL92                                   | 5-8                    | Yes           | Prednisone                   | Yes            |
| NOPHO       | Protocol mix (92-2000 or 2000 to Pilot) | 5-8                    | Yes           | Prednisone                   | Yes            |
| NOPHO       | ALL2000                                 | 5-8                    | Yes           | Prednisone                   | Yes            |
| PLLSG       | ALL IC2002                              | No HD MTX              | Yes           | Prednisone                   | Yes            |
| SJCRH       | Total 13BH                              | 0.5 <sup>7</sup>       | Yes           | Prednisone                   | Yes            |
| SJCRH       | Total 13BL                              | 0.5 <sup>7</sup>       | Yes           | Prednisone                   | Yes            |
| SJCRH       | Total XIV                               | 0.5 <sup>7</sup>       | Yes           | Prednisone                   | Yes            |
| TCCSG       | TCCSG L99-15 SR                         | 3                      | Yes           | Prednisone                   | Yes            |
| TCCSG       | TCCSG L99-15 HR                         | 3                      | Yes           | Prednisone                   | Yes            |
| TCCSG       | TCCSG L99-1502 HR                       | 3                      | Yes           | Prednisone                   | Yes            |
| TCCSG       | TCCSG L99-15 HEX18                      | 3                      | Yes           | Prednisone                   | Yes            |
| TCCSG       | TCCSG L99-15HEX0                        | 3                      | Yes           | Prednisone                   | Yes            |
| CoALL       | COALL92                                 | 1                      | Yes           | Prednisone                   | Yes            |
| CoALL       | COALL92 HR                              | 1                      | Yes           | Prednisone                   | Yes            |
| CoALL       | COALL 97 Low Risk                       | 1                      | Yes           | Dexamethasone                | Yes            |
| CoALL       | COALL 97 High Risk                      | 1                      | Yes           | Dexamethasone                | Yes            |
| CoALL       | COALL 03 Low risk                       | 1                      | Yes           | No                           | No             |
| TPOG        | TPOG ALL97-SRE                          | 1                      | Yes           | Prednisone                   | Yes            |
| TPOG        | TPOG ALL97-HR                           | 1                      | Yes           | Prednisone                   | Yes            |
| TPOG        | TPOG ALL97-VHR                          | 1                      | Yes           | Prednisone                   | Yes            |
| TPOG        | TPOG-911                                | 1                      | Yes           | Prednisone                   | Yes            |
| TPOG        | TPOG ALL2002-SR                         | 0.5 <sup>8</sup>       | Yes           | Prednisone                   | No             |
| TPOG        | TPOG ALL2002-HR                         | 0.5 <sup>8</sup>       | Yes           | Prednisone                   | Yes            |

\*Induction therapy (type of steroid, asparaginase, anthracycline) was based on initial NCI risk stratification, but subsequent treatment assignment was based on additional genetic and day 29 response criteria.

<sup>1</sup> First high dose MTX course is 1g/m<sup>2</sup>, if tolerated 2<sup>nd</sup> course 2g/m<sup>2</sup>.

<sup>2</sup> First high dose MTX course 0.5g/m<sup>2</sup>, if tolerated 2<sup>nd</sup> course 2g/m<sup>2</sup>, if tolerated following course 5g/m<sup>2</sup>.

BUITENKAMP, et al. AN INTERNATIONAL RETROSPECTIVE ANALYSIS OF DS ALL  
SUPPLEMENTARY FIGURES AND TABLES

<sup>3</sup> First course of MTX  $0.5\text{g}/\text{m}^2$ , if tolerated 2<sup>nd</sup> course  $1\text{g}/\text{m}^2$ . If not tolerated, continue to reduce each dose by 25% until tolerated.

<sup>4</sup> DS patients not eligible for randomization to  $2.5\text{ mg}/\text{m}^2$  MTX.

<sup>5</sup> From September 2002, DS ALL patients were only enrolled in VLR and AR1 risk groups, and received  $0.5\text{g}/\text{m}^2$  MTX.

<sup>6</sup> Children <4 years of age receive  $8\text{ g}/\text{m}^2$ , and those older received  $6\text{g}/\text{m}^2$ .

<sup>7</sup> High dose MTX is limited to  $0.5\text{g}/\text{m}^2$  for all course, leucovorin rescue from T=30 and vigorous hydration.

<sup>8</sup> High dose MTX is limited to  $0.5\text{g}/\text{m}^2$ , normal dose is  $2.5\text{ g}/\text{m}^2$  for SR and  $5.0\text{ g}/\text{m}^2$  for HR patients.

**Supplementary Table 4. Patient characteristics and outcome parameters of the 5 excluded T cell**

**DS-ALL patients.**

| ID | Age, y | Sex | WBC   | CNS | Lymph nodes | Hepato megaly | Testis infiltration | Karyotype                                                                     | CR  | Relapse (RFS) | Dead (OS)  |
|----|--------|-----|-------|-----|-------------|---------------|---------------------|-------------------------------------------------------------------------------|-----|---------------|------------|
| 1  | 13.6   | M   | 55.9  | No  | No          | No            | No                  | 47,XY,+21c                                                                    | Yes | No            | No (101)   |
| 2  | 9.1    | F   | 231.6 | No  | No          | No            | NK                  | 47,XX,+21c                                                                    | Yes | No            | No (78)    |
| 3  | 2.2    | M   | 50.2  | No  | No          | No            | No                  | 47,XY,t(1;16)(p34),t(3;6)(q24;p12),del(4)(q34),der(7)t(1;7)(q32;q36),+21c[18] | Yes | Yes (13.2)    | Yes (18.5) |
| 4  | 11.2   | M   | 0.6   | No  | Yes         | Yes           | No                  | NK                                                                            | NK  | NK            | No (60)    |
| 5  | 3.5    | M   | 5.5   | No  | NK          | Yes           | NK                  | 47,XY,+21c[10]                                                                | Yes | No            | No (154)   |

WBC, white blood cell count x 10<sup>9</sup>/L; CNS, central nervous system; CR, complete remission; RFS, relapse free survival in months; OS, overall survival in months; M, male; F, female; NK, not known.



**Supplementary Table 5. *JAK2* and *CRLF2* subgroup analysis**

|                                                      | <i>JAK2/CRLF2</i> cohort (n=182) | Residual cohort (n=471) | P-value |
|------------------------------------------------------|----------------------------------|-------------------------|---------|
| <b>Age at diagnosis (range)</b>                      | 5.1 (1.2-17.2)                   | 5.0 (1.2-17.9)          | 0,6     |
| <b>Sex</b>                                           |                                  |                         |         |
| Male (%)                                             | 98 (54)                          | 245 (52)                |         |
| Female (%)                                           | 84 (46)                          | 226 (48)                | 0,68    |
| <b>Median initial WBC x 10<sup>9</sup>/L (range)</b> | 11.7 (1.0-322)                   | 9.5 (0.2-459)           | 0,15    |
| <b>Extra medullary disease</b>                       |                                  |                         |         |
| CNS (%)                                              | 8/176* (4.5)                     | 8/440* (1.8)            | 0.06    |
| <b>Molecular aberrations</b>                         |                                  |                         |         |
| <i>JAK1</i>                                          | 2/141* (1.4)                     |                         |         |
| <i>JAK2 R683</i>                                     | 30/141* (21.3)                   |                         |         |
| <i>IGH@-CRLF2</i>                                    | 6/134* (4.5)                     |                         |         |
| <i>P2RY8-CRLF2</i>                                   | 87/134* (69.4)                   |                         |         |
| <b>8-year OS</b>                                     | 73 ± 5%                          | 83 ± 8%                 | 0,13    |
| <b>8-year EFS</b>                                    | 62 ± 6%                          | 71 ± 8%                 | 0,21    |
| <b>8-year CIR</b>                                    | 26 ± 6%                          | 22 ± 8%                 | 0,44    |

\*Number of patients available for analysis.

**Supplementary Table 6. Patient characteristics of NCI-SR DS-ALL patients considered**

**HR by PdL DS risk group criteria.**

|                                                      | <b>High risk modified model</b> |
|------------------------------------------------------|---------------------------------|
| <b>Number</b>                                        | 246                             |
| <b>Age at diagnosis (range)</b>                      | 5.2 (1.2 - 9.9)                 |
| <b>Sex</b>                                           |                                 |
| Male                                                 | 136                             |
| Female                                               | 110                             |
| <b>Median initial WBC x 10<sup>9</sup>/L (range)</b> | 16.4 (0.5 - 48.8)               |
| <b>Extra medullary disease</b>                       |                                 |
| CNS (%)                                              | 6/234* (2.6)                    |
| Lymph nodes (%)                                      | 64/159* (40.3)                  |
| Hepatomegaly (%)                                     | 100/171* (58.5)                 |
| Testis (%)                                           | 1/117* (<1)                     |
| <b>Survival</b>                                      |                                 |
| 10-year OS                                           | 73±3%                           |
| 10-year EFS                                          | 63±4%                           |
| 10-year TRM                                          | 7±2%                            |
| 2-year CIR                                           | 30±4%                           |
| <b>Median time to relapse in years (range)</b>       | 3.2 (4.4 months - 9.3 years)    |
| <b>Cytogenetic subgroups</b>                         | 171*                            |
| Normal karyotype (%)                                 | 71 (41.5)                       |
| <i>MLL</i> (%)                                       | 1 (<1)                          |
| <i>ETV6-RUNX1</i> (%)                                | 11 (6.4)                        |
| High hyperdiploidy (%)                               | 18 (10.5)                       |
| Other (%)                                            | 70 (40.9)                       |

WBC, white blood cell count; CNS, central nervous system; OS, overall survival; EFS, event-free survival; TRM, treatment-related mortality; CIR, cumulative incidence of relapse, \*Number of patients available for analysis.

BUITENKAMP, et al. AN INTERNATIONAL RETROSPECTIVE ANALYSIS OF DS ALL  
 SUPPLEMENTARY FIGURES AND TABLES

**Supplementary Table 7. Specified cause of death for TRM.**

| Patient ID | Cause of death                                                                    | Treatment phase           | Study group |
|------------|-----------------------------------------------------------------------------------|---------------------------|-------------|
| 1          | Infection                                                                         | Induction                 | DFCI        |
| 2          | Infection                                                                         | Induction                 | AIEOP       |
| 3          | Infection                                                                         | Induction                 | UKCLWP      |
| 4          | Suspected infection, unknown organism                                             | Induction                 | NOPHO       |
| 5          | Suspected infection, unknown organism                                             | Induction                 | NOPHO       |
| 6          | Infection and Epidermolysis Bullosa                                               | Induction                 | UKCLWP      |
| 7          | Gram positive infection: Streptococcus alpha                                      | Induction                 | CCG         |
| 8          | Pseudomonas aeruginosa                                                            | Induction                 | NOPHO       |
| 9          | Pseudomonas aeruginosa septicaemia                                                | Induction                 | TPOG        |
| 10         | Serratia marcescens in blood and urine                                            | Induction                 | CCG         |
| 11         | Para-influenza pneumonitis                                                        | Induction                 | UKCLWP      |
| 12         | Adenovirus during leukopenia                                                      | Induction                 | COALL       |
| 13         | Candida Albicans pneumonia                                                        | Induction                 | SJCRH       |
| 14         | Chemotherapy related toxicity                                                     | Induction                 | NOPHO       |
| 15         | Chemotherapy related toxicity                                                     | Induction                 | BFM-Austria |
| 16         | Central nervous system toxicity                                                   | Induction                 | CCG         |
| 17         | Coagulation disturbances (thrombosis in omentum to intestinal ischemia)           | Induction                 | NOPHO       |
| 18         | Haemorrhage                                                                       | Induction                 | UKCLWP      |
| 19         | Pseudomonas septicaemia                                                           | Delayed intensification   | UKCLWP      |
| 20         | Gram negative septicaemia, aspiration and septic shock                            | Delayed intensification   | UKCLWP      |
| 21         | Rhinovirus                                                                        | Delayed intensification   | UKCLWP      |
| 22         | Respiratory syncytial virus                                                       | Delayed intensification   | CCG         |
| 23         | Sepsis                                                                            | Interim maintenance       | BFM-Germany |
| 24         | Cardiopulmonary decompensation                                                    | Interim maintenance       | BFM-Germany |
| 25         | Infection during aplasia                                                          | Consolidation             | BFM-Germany |
| 26         | Infection and neutropenia                                                         | Consolidation             | UKCLWP      |
| 27         | Haemorrhage                                                                       | Consolidation             | UKCLWP      |
| 28         | Atypical pneumonia during aplasia                                                 | Consolidation             | BFM-Germany |
| 29         | Candida septicaemia                                                               | Intensified consolidation | POG         |
| 30         | Infection                                                                         | Maintenance               | DFCI        |
| 31         | Fulminant sepsis, multi organ failure                                             | Maintenance               | BFM-Germany |
| 32         | Detection of adenovirus in stool and serum, acute liver failure                   | Maintenance               | BFM-Germany |
| 33         | Infection, pneumonia                                                              | Maintenance               | BFM-Germany |
| 34         | Sepsis, aplasia                                                                   | Maintenance               | BFM-Germany |
| 35         | Septic shock                                                                      | Maintenance               | UKCLWP      |
| 36         | Septic shock                                                                      | Maintenance               | TPOG        |
| 37         | Septic shock, Acute Respiratory Distress Syndrome                                 | Maintenance               | DCOG        |
| 38         | Pseudomonas septicaemia                                                           | Maintenance               | UKCLWP      |
| 39         | Pneumonia, septicaemia, acute renal failure                                       | Maintenance               | UKCLWP      |
| 40         | Infection and lymphoproliferative disease (EBV associated)                        | Maintenance               | POG         |
| 41         | Bacterial pneumonia                                                               | Maintenance               | UKCLWP      |
| 42         | Bacillus meningitis                                                               | Maintenance               | CCG         |
| 43         | Aspergillus pneumonia                                                             | Maintenance               | UKCLWP      |
| 44         | RSV pneumonitis                                                                   | Maintenance               | UKCLWP      |
| 45         | Influenza                                                                         | Maintenance               | UKCLWP      |
| 46         | Cardiopulmonary failure secondary to overwhelming sepsis, presumed viral etiology | Maintenance               | POG         |
| 47         | Cardiopulmonary circulatory failure during conditioning for SCT                   | Maintenance               | BFM-Germany |
| 48         | Chemotherapy related toxicity                                                     | Maintenance               | CCG         |
| 49         | Renal insufficiency                                                               | Maintenance               | EORTC-CLG   |
| 50         | Haemorrhage                                                                       | Maintenance               | UKCLWP      |
